# Supplementary material
Source: publisher figshare collection journal article supplement (https://sage.figshare.com/ndownloader/files/16861589)
Supplement: Supplementary file 1 [file 16861589]

Table S1

*Problems and Priorities Related to Armed Conflict and Intimate Partner Violence Exposure among Women in Northeastern Uganda.*

| Problem                                                                                                                                                                                                                                                                                                                                                                                                                                                                        | Definition(s)                                                                                                       | Community Level<br>Armed Conflict                                                                                                                                            | Relational Level<br>Intimate Partner Violence                                                                                                                                                                     | Top<br>3** |
|--------------------------------------------------------------------------------------------------------------------------------------------------------------------------------------------------------------------------------------------------------------------------------------------------------------------------------------------------------------------------------------------------------------------------------------------------------------------------------|---------------------------------------------------------------------------------------------------------------------|------------------------------------------------------------------------------------------------------------------------------------------------------------------------------|-------------------------------------------------------------------------------------------------------------------------------------------------------------------------------------------------------------------|------------|
| <b>Socioeconomic Victimization</b>                                                                                                                                                                                                                                                                                                                                                                                                                                             |                                                                                                                     |                                                                                                                                                                              |                                                                                                                                                                                                                   |            |
| Socioeconomic Neglect (no money for buying necessities like soap, food, salt; no support from my husband; my husband has refused to take care of my children; no family support; doesn't buy clothes for children; negligence; he abandoned me alone with the children; denial of medical treatment for woman or children; not allowed access to cattle for plowing; denied land; refusal to educate children; hardships in farming/ no agricultural support from husband) 35* | When husband doesn't help or care, help with garden work or support with agricultural inputs.                       | N/A                                                                                                                                                                          | He [husband] always tells me to go to the bush to look for food, saying there is plenty of it there. He only gave me 1000 Shillings to use for meals for three days and kept the remaining money with his mother. | Y          |
| Property Loss (burned houses; uprooted and destroyed food crops in the garden; grabbed [stolen] property; loss of household items; loss of livestock/ cattle raids; violation of rights, steals money that she works for; other theft; destruction of property; sale of household property without consent; forcefully sells the food grown; husband doesn't allow her to do some small business) 22*                                                                          | Looting or destruction of livestock, property, food, personal belongings, or money by use of force or intimidation. | This also happened during the LRA insurgencies where we were displaced and only to come back to find the houses burnt to ashes. We lost entirely everything that was inside. | One day when we had a fight, he [husband] tore my beddings, clothes, and broke my utensils.                                                                                                                       | Y          |
| Displacement/chased from home (displacement/migration; chased from home; forced to sleep in the bush; forced to stay in                                                                                                                                                                                                                                                                                                                                                        | The forceful leaving of one's home in order to                                                                      | The Karamajongs chased us while shooting us with guns as they followed us from behind,                                                                                       | He [husband] chased me from his compound, and I                                                                                                                                                                   | Y          |

|                                                                                                                                    |                                                                                                                                                               |                                                                                                                                                                                                                                                                                         |                                                                                                                                                                     |   |
|------------------------------------------------------------------------------------------------------------------------------------|---------------------------------------------------------------------------------------------------------------------------------------------------------------|-----------------------------------------------------------------------------------------------------------------------------------------------------------------------------------------------------------------------------------------------------------------------------------------|---------------------------------------------------------------------------------------------------------------------------------------------------------------------|---|
| the camp; forced to seek safety elsewhere) 14*                                                                                     | take refuge somewhere else.                                                                                                                                   | and we ran to stay in some place that was secure for us in bigger numbers.”                                                                                                                                                                                                             | went and built at my son’s new plot.                                                                                                                                |   |
| <b>Socioeconomic Outcomes</b>                                                                                                      |                                                                                                                                                               |                                                                                                                                                                                                                                                                                         |                                                                                                                                                                     |   |
| Poverty (shortage of or difficulty buying food; hunger; poverty; inadequate or poor housing) 34*                                   | Having no money at hand because of being poor, lacking important things of life, lacking enough land while at the camp, shortage of food, hunger, houses leak | While there [in the camp], we were surviving on one meal a day to cut on the consumption such that we spared for the other days. We went to Katakwi and also the government supplied food but was not enough and they could take a very long time to refill- so that left us in hunger. | He [husband] beat me until I ran back to my home. Upon returning, I found that the goats had eaten all the cassava I had planted. He also doesn’t buy food at home. | Y |
| Diminished Access to Medical Care (unable to get treatment for children; poor health; no funds for transport to health center) 12* | He never minds of you or your children when sick.                                                                                                             | N/A                                                                                                                                                                                                                                                                                     | He [husband] sometimes doesn’t allow me to go to the hospital. He doesn’t give me money for treating the children. He leaves everything to me.                      | Y |
| Reduced Access to Education (failure to educate children; failure to continue with woman’s education) 8*                           | Halt in schooling, declined education.                                                                                                                        | Due to disturbances by the Karamajong, the children’s schooling was disorganized.                                                                                                                                                                                                       | He is not bothered about children’s education. I do it solely alone.                                                                                                | Y |
| <b>Physical Victimization</b>                                                                                                      |                                                                                                                                                               |                                                                                                                                                                                                                                                                                         |                                                                                                                                                                     |   |
| Beatings (beatings; fights; violence) 10*                                                                                          | Someone physically assaulting you. No peaceful stay at home.                                                                                                  | He [husband] used to beat me a lot and injured me several times. This was done by the LRA as well. They beat me and abandoned.                                                                                                                                                          | This is when my husband gets a stick and chases me while beating me with it.                                                                                        | Y |
| Abduction 1*                                                                                                                       | Forcefully taken                                                                                                                                              | I was abducted together with my brother and two other people and we almost reached their homesteads but they released us                                                                                                                                                                | N/A                                                                                                                                                                 | Y |

in the morning at around 7am  
and we got back.

| Relational Victimization                           |                                                                          |                                                                                                                                                                                                                                                                                                                                                                     |                                                                                                                                                                                                                                               |   |
|----------------------------------------------------|--------------------------------------------------------------------------|---------------------------------------------------------------------------------------------------------------------------------------------------------------------------------------------------------------------------------------------------------------------------------------------------------------------------------------------------------------------|-----------------------------------------------------------------------------------------------------------------------------------------------------------------------------------------------------------------------------------------------|---|
| Loss of lives (loss of loved ones; witchcraft) 17* | Loss of life caused by rebel attacks, raids, and witchcraft.             | My uncle was murdered during that time of insurgency. This was the most trying moment because our uncle was very supportive, so when we heard he was killed, it raised a dark cloud to us, especially my elder brothers and sisters who were school going. We lost him and yet he was the one who supported our family with school fees and food in some instances. | My children died due to juju [witchcraft] done by relatives.                                                                                                                                                                                  | Y |
| Physical Outcomes                                  |                                                                          |                                                                                                                                                                                                                                                                                                                                                                     |                                                                                                                                                                                                                                               |   |
| Injuries 8*                                        | Inward and outward wounds caused by beating.                             | The Karamajongs hit me with the back of the gun and injured my rib area as I was trying to resist rape. I sometimes cough blood as a result of the injury. The injury has made it hard for me to lift or do anything heavy.                                                                                                                                         | He [husband] beats me several times and hurts me. There is a day he hit my head with a log. I fell down and collapsed. On coming to my senses, my ears had bled and that has affected my hearing up to now. Tried treating but no big change. | Y |
| Illness 6*                                         | Sickness or disease, feeling weak because of the body and joints paining | I gave birth in water when trying to take refuge from LRA rebels. I got the disease of typhoid as a result of walking in dirty water after giving birth. I started                                                                                                                                                                                                  | He always tells me hurting words, and he also doesn't treat me when I and the child fall sick.                                                                                                                                                | Y |

|                                                                                                                   |                                                                                   |                                                                                                                               |                                                                                                                                                                                        |   |
|-------------------------------------------------------------------------------------------------------------------|-----------------------------------------------------------------------------------|-------------------------------------------------------------------------------------------------------------------------------|----------------------------------------------------------------------------------------------------------------------------------------------------------------------------------------|---|
|                                                                                                                   |                                                                                   | pouring too much blood when breastfeeding.                                                                                    |                                                                                                                                                                                        |   |
| Loss of weight 1*                                                                                                 | ----                                                                              | N/A                                                                                                                           | I keep on losing weight.                                                                                                                                                               | N |
| Sexual Victimization                                                                                              |                                                                                   |                                                                                                                               |                                                                                                                                                                                        |   |
| Rape (sexual assault; rape) 8*                                                                                    | Forcing someone to have sex without someone's permission.                         | I was caught and raped by Karamajong warriors and I became helpless since they had guns and threatened to kill me if I don't. | He [husband] rapes me each time he comes back drunk.                                                                                                                                   | Y |
| Psychological Victimization                                                                                       |                                                                                   |                                                                                                                               |                                                                                                                                                                                        |   |
| Psychological abuse (insults; harassment; anger/rude/tough; no respect; embarrassing in public; death threats) 8* | Talking ill of someone or talking negative words, humiliation.                    | When my family and friends were killed, I got threatened.                                                                     | My husband and his people always throw threats at me to a level that one day somebody came hiding by my door side with a gun and fortunately I didn't come out of the house that time. | N |
| Denial of rights (no social life; husband forbids from talking and staying with neighbors; no child spacing) 3*   | ----                                                                              | N/A                                                                                                                           | Doesn't want me to sit with my friends and share thoughts, saying that's how they get for me boyfriends.                                                                               | N |
| Psychological Outcomes                                                                                            |                                                                                   |                                                                                                                               |                                                                                                                                                                                        |   |
| Depression (depression; many thoughts) 3*                                                                         | This results from anger because when you are upset, you develop a lot of thoughts | N/A                                                                                                                           | With whatever I have gone through, I really think a lot about the type of life in my family- especially from my husband.                                                               | Y |
| Feeling restless/ not settled 3*                                                                                  | Staying in fear of death or attack of any kind.                                   | Having unrest due to war or any form of attack.                                                                               | My husband's character scares me a lot. When he is around, I'm not myself. I'm always in fear of being                                                                                 | N |

|                               |                                                                          |     |                                                                            |   |
|-------------------------------|--------------------------------------------------------------------------|-----|----------------------------------------------------------------------------|---|
|                               |                                                                          |     | beaten and being killed<br>some day.                                       |   |
| Anger 1*                      | When I ask for<br>something and am<br>not given.                         | N/A | He always says there's no<br>money, yet he takes brew<br>every day.        | Y |
| Traumatization of children 1* | Making children<br>feel out of place<br>when parents<br>develop a grudge | N/A | Children feel oppressed and<br>fail to speak out what they<br>really feel. | Y |

---

*Note.* \*Indicates frequency mentioned.

\*\*Indicates whether participants identified this problem as being ranked among the top three problems experienced.
